# Supplementary material
Source: PubMed Central journal article supplement (PMC3234729)

## Supplemental Figures

### Figure Legends

**Figure S1.** *In vitro* differentiation of osteoclasts from BMM cells infected with pMX-puro (con), wild-type HA-GSK-3 $\beta$  (WT), constitutively active HA-GSK-3 $\beta$  S9A (S9A), or catalytically inactive HA-GSK-3 $\beta$  K85R (K85R), respectively. TRAP staining was performed 4 days after RANKL stimulation. TRAP<sup>+</sup> MNCs (> 3 nuclei) were counted. Data represent means  $\pm$  SD. \* $P$  < 0.05, \*\* $P$  < 0.01.

**Figure S2.** BMMs infected with retroviruses expressing either empty vector (EV), HA-GSK-3 $\beta$  S9A (S9A), or HA-GSK-3 $\beta$  K85R (K85R) were cocultured with osteoblasts for 7 days in the presence of 1,25(OH)<sub>2</sub>D<sub>3</sub> and PGE<sub>2</sub>. TRAP staining was performed and TRAP<sup>+</sup> MNCs were counted. Data represent means  $\pm$  SD. \* $P$  < 0.05, \*\* $P$  < 0.01. Scale bar, 200  $\mu$ m.

**Figure S3.** Generation of Tg mice expressing GSK-3 $\beta$  S9A mutant under the control of TRAP promoter. (A) Schematic diagram of the TRAP-GSK-3 $\beta$ -S9A construct. Constitutively active GSK-3 $\beta$  S9A cDNA was fused to 1.8 kb of the mouse TRAP gene promoter. GT or GP primer indicates specific primers for the transgene. (B) Genomic DNA isolated from the tail was analyzed by PCR using specific primers for the transgene. (C) BMMs isolated from GSK-3 $\beta$  S9A Tg (TG) mice or wild-type littermates (WT) were cultured in the presence of RANKL as indicated. The expression of transgene was confirmed by RT-PCR analysis using a specific primer (GT primer) for GSK-3 $\beta$  S9A or  $\beta$ -actin.

**Figure S4.** GSK-3 $\alpha$  had no significant effect on RANKL-induced osteoclast differentiation. *In vitro* differentiation of osteoclasts from BMMs infected with pMX-puro (con), V5-GSK-3 $\alpha$  (WT), or catalytically inactive V5-GSK-3 $\alpha$ K 148A (K148A), respectively. TRAP staining

was performed 4 days after RANKL stimulation. TRAP<sup>+</sup> MNCs containing more than 3 nuclei were counted. GSK-3 $\alpha$  expression following infection was confirmed by Western blot analysis using the V5 antibody and then reprobbed with GAPDH as a loading control. Data represent means  $\pm$  SD.

Figure S1

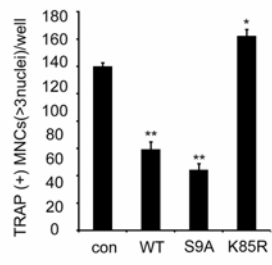

Figure S2

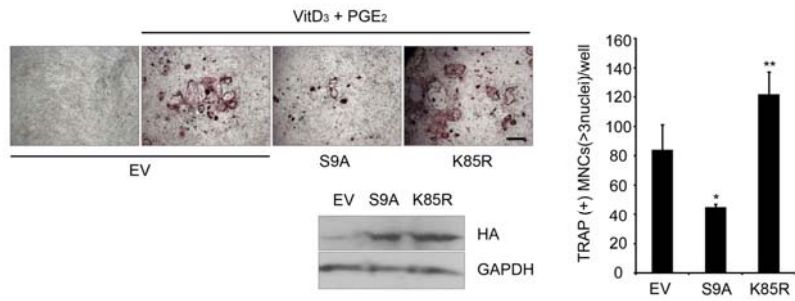

Figure S3

A

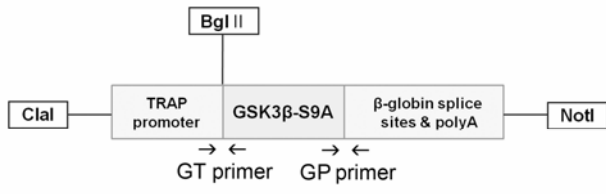

B

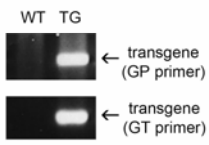

C

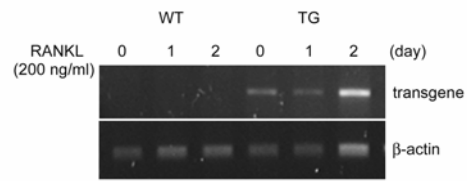

Figure S4

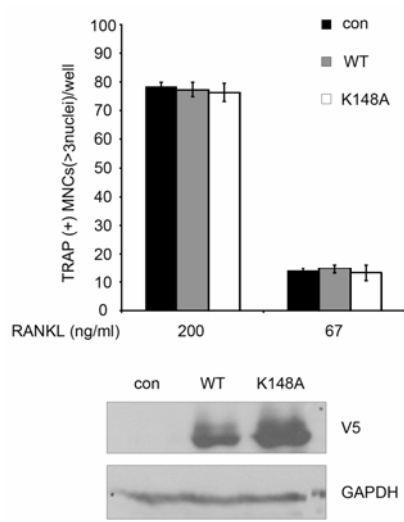

Supplement: supp_M111.256768_jbc.M111.256768-1.pdf [file supp_M111.256768_jbc.M111.256768-1.pdf]
